# Supplementary material for: Engineered PAM-flexible FnCas9 variants for robust and specific genome editing and diagnostics
Source: Research Square preprint supplement (doi:10.21203/rs.3.rs-990232/v2), 2021-11-05
Supplement: Supplementary file 4 [file ea12faee4df7b5b8255219aa.xlsx]

## Sheet: Sheet1
FnCas9 variants	Amino acid position	amino acid change
en1	1369	E>R
en2	1449	E>H
en3	1369, 1449	E>R, E>H
en4	1243	G>T
en5	1369	E>Y
en6	1392	G>R
en7	1392	G>K
en8	1448	N>R
en9	1448	N>Y
en10	1451_1452	ins V
en11	1473	S>T
en12	1553	N>V
en13	1586	Y>H
en14	1586	Y>R
en15	1603	E>H
en17	1369, 1449, 1556	E>R, E>H, R>T
en18	1233	F>Y
en19	1475	A>F
en20	1499	S>H
en21	1580	S>R
en22	1583	K>R
en23	1609	K>V
en24	1609	K>S
en25	1609	K>N
en26	1605	S>F
en27	1605	S>R
en28	1386_1387	ins RR
en29	1586, 1603	Y>H, E>H
en30	1392, 1448	G>K, N>Y
en31	1369, 1449, 1243	E>R, E>H, G>T
en32	1369, 1449, 1392	E>R, E>H, G>K
en33	1369, 1449,1448	E>R, E>H, N>Y
en34	1369, 1603	E>R, E>H
en35	1369, 1392	E>R, G>K
en36	1369, 1448	E>R, N>R
en37	1369, 1448	E>R, N>Y
en38	1369, 1475	E>R, A>F
en39	1369, 1580	E>R, S>R
en40	1369, 1243	E>R, G>T
en41	1369, 1556	E>R, R>Q
en42	1603, 1392	E>H, G>K
en43	1603, 1448	E>H, N>R
en44	1603, 1448	E>H, N>Y
en45	1603, 1475	E>H, A>F
en46	1603, 1580	E>H, S>R
en47	1603, 1243	E>H, G>T
en48	1603, 1556	E>H, R>Q
en49	1556	R>Q
en50	1369, 1449, 1556	E>R, E>H, R>Q
