# Supplementary material for: Engineered PAM-flexible FnCas9 variants for robust and specific genome editing and diagnostics
Source: Research Square preprint supplement (doi:10.21203/rs.3.rs-990232/v2), 2021-11-05
Supplement: Supplementary file 5 [file 6411fb7488e0dea059e8494a.xlsx]

## Sheet: Sheet1
For plasmid construct generation			Comments	Used in Fig.
en1FnCas9-FP	CGACGCGTGAAAGATCAAAAGTATTGACGATGTC	34	E1369R on WTFnCas9 for protein purification
en1FnCas9-RP	AGACCTACCTCAGGAACTCTAAGCCAGGGA	30
en2FnCas9-FP	CACGGCAAGTTTCTGGTGAAGAGAAAAACTTGGG	34	E1449H on WTFnCas9 for protein purification
en2FnCas9-RP	GTTTGTACTGATGGGCAGAGAGAAGTCTTTCCG	33
en4FnCas9-FP	ACAATCTATGCAGAGAATTACCTGCCTATCCTG	33	G1243T on WTFnCas9 for protein purification
en4FnCas9-RP	ATCCCTAGTCATCTGTCTGTGTGTGTGTTAAACCC	35
en5FnCas9-FP	TATCGCGTGAAAGATCAAAAGTATTGACGATGTC	34	E1369Y on WTFnCas9 for protein purification
en5FnCas9-RP	AGACCTACCTCAGGAACTCTAAGCCAGGGA	30
en6FnCas9-FP	CGAAAGATCACACTGCCCTTCAAGAAAGAGTGGC	34	G1392R on WTFnCas9 for protein purification
en6FnCas9-RP	GCAGGTCCTGGACAAGGATTCAAACTTCATCATC	34
en7FnCas9-FP	AAAAAGATCACACTGCCCTTCAAGAAAGAGTGGC	34	G1392K on WTFnCas9 for protein purification
en7FnCas9-RP	GCAGGTCCTGGACAAGGATTCAAACTTCATCATC	34
en8FnCas9-FP	AGGGAGGGCAAGTTTCTGGTGAAGAGAAAAACTTG	35	N1448R on WTFnCas9 for protein purification
en8FnCas9-RP	TGTACTGATGGGCAGAGAGAAGTCTTTCCGGAC	33
en9FnCas9-FP	TACGAGGGCAAGTTTCTGGTGAAGAGAAAAACTTG	35	N1448Y on WTFnCas9 for protein purification
en9FnCas9-RP	TGTACTGATGGGCAGAGAGAAGTCTTTCCGGAC	33
en10FnCas9-FP	GTGTTTCTGGTGAAGAGAAAAACTTGGGATAATAA	35	1451V_INS _1452 on WTFnCas9 for protein purification
en10FnCas9-RP	GCCCTCGTTTGTACTGATGGGCAGAGAGAAGTC	33
en11FnCas9-FP	ACCAGGGCAGACGGGACTAAACCCTTCATTCCTG	34	S1473T on WTFnCas9 for protein purification
en11FnCas9-RP	ATCTGAGTCATTCAGAATCTGGTAGATGAAG	31
en12FnCas9-FP	GTGAACTCACGCCCCAAGGTGCGAGTCAAACTG	33	N1553V on WTFnCas9 for protein purification
en12FnCas9-RP	CGGCATTGCTACCATTCAGTACAAGATCGAC	31
en13FnCas9-FP	CACCCCGACAAAGTCCTGGAGATCCTGAAGCAG	33	Y1586H on WTFnCas9 for protein purification
en13FnCas9-RP	CCGGCTCTTCAGCAGTGAGTGATTCATGAAATAG	34
en14FnCas9-FP	CGGCCCGACAAAGTCCTGGAGATCCTGAAGCAG	33	Y1586R on WTFnCas9 for protein purification
en14FnCas9-RP	CCGGCTCTTCAGCAGTGAGTGATTCATGAAATAG	34
en15FnCas9-FP	CACAGTTCAGGGTTTAACAAAACTATTAAGGAG	33	E1603H on WTFnCas9 for protein purification
en15FnCas9-RP	GAACTCAATGATTGTGCTCTGCTTCAGGATCTC	33
en17FnCas9-FP	ACTCCCAAGGTGCGAGTCAAACTGGATTACGTG	33	R1556T on WTFnCas9 for protein purification
en17FnCas9-RP	TGAGTTATTGTCGATCTTGTACTGAATGGTAGC	33
en18FnCas9-FP	TATAACACACACAGACAGATGACTAGGGATGG	32	F1233Y on WTFnCas9 for protein purification
en18FnCas9-RP	CCCTTCAATAGCTTTCTTTCTGACCAGTTTC	31
en19FnCas9-FP	TTTGACGGGACTAAACCCTTCATTCCTGCCTTTG	34	A1475F on WTFnCas9 for protein purification
en19FnCas9-RP	CCTGCTATCTGAGTCATTCAGAATCTGGTAGATG	34
en20FnCas9-FP	CATTTCACCTCAAAAAACATCTTTTGGCTGCC	32	S1449H on WTFnCas9 for protein purification
en20FnCas9-RP	GTCAATGATGGCTTCCACAATCTCGTTCTTGC	32
en21FnCas9-FP	CGTCTGCTGAAGAGCCGGTATCCCGACAAAGTC	33	S1580R on WTFnCas9 for protein purification
en21FnCas9-RP	GTGATTCATGAAATAGTTAATCTTGCTGTCATCG	34
en22FnCas9-FP	CGTAGCCGGTATCCCGACAAAGTCCTGGAGATC	33	K1583R on WTFnCas9 for protein purification
en22FnCas9-RP	CAGCAGTGAGTGATTCATGAAATAGTTAATCTTGC	35
en23FnCas9-FP	GTGACTATTAAGGAGATGCTGGGAATGAAGCTGG	34	K1609V on WTFnCas9 for protein purification
en23FnCas9-RP	GTTAAACCCTGAACTTTCGAACTCAATGATTGTG	34
en24FnCas9-FP	TCTACTATTAAGGAGATGCTGGGAATGAAGCTGG	34	K1609S on WTFnCas9 for protein purification
en24FnCas9-RP	GTTAAACCCTGAACTTTCGAACTCAATGATTGTG	34
en25FnCas9-FP	AACACTATTAAGGAGATGCTGGGAATGAAGCTGG	34	K1609N on WTFnCas9 for protein purification
en25FnCas9-RP	GTTAAACCCTGAACTTTCGAACTCAATGATTGTG	34
en26FnCas9-FP	TTTGGGTTTAACAAAACTATTAAGGAGATGCTGGG	35	S1605F on WTFnCas9 for protein purification
en26FnCas9-RP	ACTTTCGAACTCAATGATTGTGCTCTGCTTCAGG	34
en27FnCas9-FP	CGTGGGTTTAACAAAACTATTAAGGAGATGCTGGG	35	S1605R on WTFnCas9 for protein purification
en27FnCas9-RP	ACTTTCGAACTCAATGATTGTGCTCTGCTTCAGG	34
en28FnCas9-FP	CGTTCAAACTTCATCATCGGAAAGATCACACTGC	34	1386_INS RR_1387 on WTFnCas9 for protein purification
en28FnCas9-RP	TCTCTTGTCCAGGACCTGCTTGACATCGTCAATAC	35
en50FnCas9-FP	CAGCCCAAGGTGCGAGTCAAACTGGATTACGTG	33	R1556Q on WTFnCas9 for protein purification
en1dFnCas9GFP_FP	CTGGCTTATAGGTCTAGGCGCGTGAAGATCAAAAG	35	Site-directed mutagenesis (SDM) on dFnGFP backbone for MST
en1dFnCas9GFP_RP	CTTTTGATCTTCACGCGCCTAGACCTATAAGCCAG	35
en15dFnCas9GFP_FP	CAGAGCACAATCATTGAGTTCCACAGTTCAGGGTTTAACAAAAC	44	SDM on dFnGFP backbone for MST
en15dFnCas9GFP_RP	GTTTTGTTAAACCCTGAACTGTGGAACTCAATGATTGTGCTCTG	44
3xHA-FnCas9-E1369R_FP	CTGGCTTATAGGTCTAGGCGCGTGAAGATCAAAAG	35	SDM on mammalian expression vector
3xHA-FnCas9-E1369R_RP	CTTTTGATCTTCACGCGCCTAGACCTATAAGCCAG	35
3xHA-FnCas9-E1603H_FP	CAGAGCACAATCATTGAGTTCCACAGTTCAGGGTTTAACAAAAC	44	SDM on mammalian expression vector
3xHA-FnCas9-E1603H_RP	GTTTTGTTAAACCCTGAACTGTGGAACTCAATGATTGTGCTCTG	44
FnCas9 truncation_FP	GCCACCACTATAGCCGTCAGTAATAAAAGAGAATCC	36	For protein purification
FnCas9 truncation_RP	GGTTCAGCAGTCAATAAGATCAAAAGCGAGATGGCATC	38
IVT template synthesis
pUC119_IVT_sg20	TAATACGACTCACTATAGGAAATTAGGTGCGCTTGGCGTTTCAGTTGCGCCGAAAGGCGCTCTGTAATCATT	72	For IVC assay using pUC119
pUC119_IVT_sg21	TAATACGACTCACTATAGGGAAATTAGGTGCGCTTGGCGTTTCAGTTGCGCCGAAAGGCGCTCTGTAATCATT	73	For IVC assay using pUC119
pUC119_IVT_sg22	TAATACGACTCACTATAGGGGAAATTAGGTGCGCTTGGCGTTTCAGTTGCGCCGAAAGGCGCTCTGTAATCATT	74	For IVC assay using pUC119
pUC119_IVT_sg23	TAATACGACTCACTATAGGGGGAAATTAGGTGCGCTTGGCGTTTCAGTTGCGCCGAAAGGCGCTCTGTAATCATT	75	For IVC assay using pUC119
pUC119_IVT_sg24	TAATACGACTCACTATAGGGGGGAAATTAGGTGCGCTTGGCGTTTCAGTTGCGCCGAAAGGCGCTCTGTAATCATT	76	For IVC assay using pUC119
HBB_IVT	TAATACGACTCACTATAGTAACGGCAGACTTCTCCTCGTTTCAGTTGCGCCGAAAGGCGCTCTGTAATCATT	72	For IVC assay using HBB DNA template
HBB_2&6sgRNA_FP	TAATACGACTCACTATAGTAACGGCAGACTTATCCACGTTTCAGTTGCGCCGAAAGGCGCTCTGTAATCATT	88	sgRNA to discriminate between sickle cell mutation and wild sequence (FELUDA assay)
FnCas9_Univ_RP	CAGACGTGTCAAACAGAGGTCCGTTCAAAATACTTTTAAATGATTACAGAGCGCCTTTCGGCGCAACTGAAAC	73	Universal reverse primer for sgRNA template preparation
For MST experiment			30nt HPLC grade DNA substrate
FP_VEGFA3	TGTGGGTGAGTGAGTGTGTGCGTGTGGGGT	30
RP_VEGFA3	ACCCCACACGCACACACTCACTCACCCACA	30
For Mismatch walking and FELUDA assay
HBB_410_FP	ACTCCTAAGCCAGTGCCAGA	20	PCR primer for 410bp HBB locus amplicon
HBB_410_RP	GGCAGAGAGAGTCAGTGCCTA	21
sgRNA cloned into Cas9 vectors for transfection in mammalian cells			Mismatches are represented in small cap red
EMX1_ON_crRNA	GAGTCCGAGCAGAAGAAGAA	20
EMX1_OT1_crRNA	GAGTtaGAGCAGAAGAAGAA	20
EMX1_OT2_crRNA	GAGTCtaAGCAGAAGAAGAA	20
c-MYC_crRNA	GGCAGAGGGAGCGAGCGGG	19
c-MYC_OT1_crRNA	GGCAGAGGGAGgGAGCGcG	19
HBB_ON_crRNA	GTAACGGCAGACTTCTCCTC	20
HBB_OT2_crRNA	GgAAaGGCAGACTTCTCCTt	20
RUNX1_ON_crRNA	GCATTTTCAGGAGGAAGCGA	20
RUNX1_OT1_crRNA	GCATTTTCAGaAGGAAGCaA	20
DNMT1_ON_crRNA	GGAGTGAGGGAAACGGCCCC	20
DNMT1_OT1_crRNA	GGAGgGAGGGAAACaGCCCC	20
HEK site 4_ON_crRNA	GGCACTGCGGCTGGAGGTGG	20
HEK site 4_OT1_crRNA	tGCACTGCGGCcGGAGGaGG	20
FANCF2_ON_crRNA	GCTGCAGAAGGGATTCCATG	20
FANCF2_OT1_crRNA	GCTGCAGAAGGGATTCCAaG	21
HBS_crRNA	GTAACGGCAGACTTCTCCAC	20
PCR primers for amplicon sequencing
EMX1_ON_FP	TCGTCGGCAGCGTCAGATGTGTATAAGAGACAGGCCTCCTGAGTTTCTCATCT	53	Amplicon-SEQ PCR
EMX1_ON_RP	GTCTCGTGGGCTCGGAGATGTGTATAAGAGACAGGTTGCCCACCCTAGTCATTG	54
EMX1_OT1_FP	TCGTCGGCAGCGTCAGATGTGTATAAGAGACAG CCATCTTGGGGTTACAGAAAG	55	Amplicon-SEQ PCR
EMX1_OT1_RP	GTCTCGTGGGCTCGGAGATGTGTATAAGAGACAGGAAACATTTACCATAGACTATCAC	58
EMX1_OT2_FP	TCGTCGGCAGCGTCAGATGTGTATAAGAGACAGACCTGGGCGAGAAAGGTAAC	53	Amplicon-SEQ PCR
EMX1_OT2_RP	GTCTCGTGGGCTCGGAGATGTGTATAAGAGACAGGGCTTTCACAAGGATGCAGT	54
c-MYC_ON_FP	TCGTCGGCAGCGTCAGATGTGTATAAGAGACAGGATCGCGCTGAGTATAAAAGC	54	Amplicon-SEQ PCR
c-MYC_ON_RP	GTCTCGTGGGCTCGGAGATGTGTATAAGAGACAGCCTATTCGCTCCGGATCTC	53
c-MYC_OT1_FP	TCGTCGGCAGCGTCAGATGTGTATAAGAGACAGGCCCCAGAAACAGTATTCCA	53	Amplicon-SEQ PCR
c-MYC_OT1_RP	GTCTCGTGGGCTCGGAGATGTGTATAAGAGACAGCAGGACTTTTTGCCCTCTGT	54
HBB_ON_FP	TCGTCGGCAGCGTCAGATGTGTATAAGAGACAGTCTCCACATGCCCAGTTTCT	53	Amplicon-SEQ PCR
HBB_ON_RP	GTCTCGTGGGCTCGGAGATGTGTATAAGAGACAGAGTCAGGGCAGAGCCATCTA	54
HBB_OT2_FP	TCGTCGGCAGCGTCAGATGTGTATAAGAGACAGGAGGGGTTGCTTTCTTGTGA	53	Amplicon-SEQ PCR
HBB_OT2_RP	GTCTCGTGGGCTCGGAGATGTGTATAAGAGACAGATGCACACAGTGGAGCCTTC	54
RUNX1_ON_FP	TCGTCGGCAGCGTCAGATGTGTATAAGAGACAGTAGGGCTAGAGGGGTGAGG	52	Amplicon-SEQ PCR
RUNX1_ON_RP	GTCTCGTGGGCTCGGAGATGTGTATAAGAGACAGAAGCACTGTGGGTACGAAGG	54
RUNX1_OT1_FP	TCGTCGGCAGCGTCAGATGTGTATAAGAGACAGGCATGATACTTTGGGGGAGA	53	Amplicon-SEQ PCR
RUNX1_OT1_RP	GTCTCGTGGGCTCGGAGATGTGTATAAGAGACAGCCCAGAAATTTAATTCCAATCAC	57
DNMT1_ON_FP	TCGTCGGCAGCGTCAGATGTGTATAAGAGACAGGTTCTAGACCCAGAGGCTCA	53	Amplicon-SEQ PCR
DNMT1_ON_RP	GTCTCGTGGGCTCGGAGATGTGTATAAGAGACAGGCTGCTGTGAGGATTGAGTG	54
DNMT1_OT1_FP	TCGTCGGCAGCGTCAGATGTGTATAAGAGACAGGTTCTAGACCCAGAGGCTCA	53	Amplicon-SEQ PCR
DNMT1_OT1_RP	GTCTCGTGGGCTCGGAGATGTGTATAAGAGACAGGCTGCTGTGAGGATTGAGTG	54
HEK site 4_ON_FP	TCGTCGGCAGCGTCAGATGTGTATAAGAGACAGGTCCAAAGCAGGATGACAGG	53	Amplicon-SEQ PCR
HEK site 4_ON_RP	GTCTCGTGGGCTCGGAGATGTGTATAAGAGACAGAACGGAGACACACACACAGG	54
HEK site 4_OT1_FP	TCGTCGGCAGCGTCAGATGTGTATAAGAGACAGAGACTCATAGCTGGGGCTGA	53	Amplicon-SEQ PCR
HEK site 4_OT1_RP	GTCTCGTGGGCTCGGAGATGTGTATAAGAGACAGATCACTGTCCCCTTGCACTC	54
FANCF2_ON_FP	TCGTCGGCAGCGTCAGATGTGTATAAGAGACAGCCAGGTGCTGACGTAGGTA	52	Amplicon-SEQ PCR
FANCF2_ON_RP	GTCTCGTGGGCTCGGAGATGTGTATAAGAGACAGTAGCATTGCAGAGAGGCGTA	54
FANCF2_OT1_FP	TCGTCGGCAGCGTCAGATGTGTATAAGAGACAGCCCACTCTCTCCTGTTCTGG	53	Amplicon-SEQ PCR
FANCF2_OT1_RP	GTCTCGTGGGCTCGGAGATGTGTATAAGAGACAGCCCATTTCTGTCTCCACCTC	54
HDR assay
hbb_crRNA
ssODN	T*C*TGACACAACTGTGTTCACTAGCAACCTCAAACAGACACCATGGTGCATCTGACTCCTGAAGAGAAGTCTGCCGTTACTGCCCTGTGGGGCAAGGTGAACGTGGATGAAGTTGGTGGT*G*A	125	Phosphothiorate modified donor template for SCD correction
DCX_crRNA	CGCTTGGTGATTCCATGTAA	20	crRNA sequence used for target DCX locus
DCX_HDR_FP	GGTCGAGATCCGGAACCCTT	20	499bp amplicon, for DCX HDR qPCR
DCX_HDR_RP	AGGGGCACTTGTGTTTGTCA	20
NGA PAM activity assays
SARS_CoV2_N501Y_crRNA	TAAGAGGGTTGGAAACCATA	20	crRNA sequence used for target N501Y containing DNA sequences
CoV2_S_N501Y_FP(237bp)	(Btn)CTATCAGGCCGGTAGCACAC	25	5' Biotinylated RT-PCR primer for N501Y target (237bp amplicon)
CoV2_S_N501Y_RP(237bp)	(Btn)ACACCTGTGCCTGTTAAACC	25	5' Biotinylated RT-PCR primer for N501Y target (237bp amplicon)
Fluorescence assays
CoV2_S_N501Y_FP(580bp)	(Btn)CCTTGTAATGGTGTTGAAGGTT		5' Biotinylated RT-PCR primer for N501Y target (580bp amplicon)
CoV2_S_N501Y_RP(580bp)	(Btn)CGCATATACCTGCACCAATG		5' Biotinylated RT-PCR primer for N501Y target (580bp amplicon)
SARS_CoV2_N501Y_crRNA	TAAGAGGGTTGGAAACCATA	20	crRNA sequence used for target N501Y containing DNA sequences
