# Supplementary material for: Engineered PAM-flexible FnCas9 variants for robust and specific genome editing and diagnostics
Source: Research Square preprint supplement (doi:10.21203/rs.3.rs-990232/v2), 2021-11-05
Supplement: Supplementary file 6 [file cc3b77ad91349f06785bf87c.xlsx]

## Sheet: dFn_myc_peaks_redundant
chromosome	start	end	start_crRNA	end_crRNA	strand	Mismatch	crRNA sequence	PAM	score	fold_enrichment	f-log10(pvalue)	-log10(qvalue)	pileup	status
chr8	127736074	127736455	183	201	+	0	GGCAGAGGGAGCGAGCGGGCGG	CGG	900	8.76234	97.347	90.0035	188	ON Target
chr8	127736074	127736455	104	122	+	6	AACGGAGGGAGGGATCGCGCTG	CTG	900	8.76234	97.347	90.0035	188	OT19
chr8	127736074	127736455	187	205	+	6	GAGGGAGCGAGCGGGCGGCCGG	CGG	900	8.76234	97.347	90.0035	188	OT18
chr16	77551743	77551894	53	71	+	3	CTGAGAGGGAGCGAGCGGGAGG	AGG	76	7.55978	12.8345	7.64797	64	OT17
chr16	77551743	77551894	73	91	+	6	GGAAGAGAGGGAGAGGGTGGGA	GGA	76	7.55978	12.8345	7.64797	64	OT16
chr16	77551743	77551894	75	93	+	6	AAGAGAGGGAGAGGGTGGGAGG	AGG	76	7.55978	12.8345	7.64797	64	OT15
chr16	77551743	77551894	81	99	+	6	GGGAGAGGGTGGGAGGAAGGGA	GGA	76	7.55978	12.8345	7.64797	64	OT14
chr16	77551743	77551894	95	113	+	5	GGAAGGGAGAGAGAGAGGGGAG	GAG	76	7.55978	12.8345	7.64797	64	OT13
chr11	76235448	76235604	92	110	+	6	CGCTTAGGGTGCGAGAGGTCCC	CCC	79	6.9395	13.1909	7.97859	26	OT12
chr6	26286507	26286611	29	47	+	5	CGCAGCGGAAGCGTGCTGGGCC	GCC	56	6.72023	10.663	5.62357	63	OT11
chr17	43233393	43233519	25	43	+	5	GACAGAGAGAGAGAGAGAGAAA	AAA	68	4.91446	11.962	6.84022	68	OT10
chr17	43233393	43233519	43	61	+	6	GAAAGAGAGAGAGAGAGAGAGA	AGA	68	4.91446	11.962	6.84022	68	OT9
chr17	43233393	43233519	47	65	+	6	GAGAGAGAGAGAGAGAGAGAGA	AGA	68	4.91446	11.962	6.84022	68	OT8
chr17	43233393	43233519	61	79	+	6	GAGAGAGAGAGAGAGAGAGACA	ACA	68	4.91446	11.962	6.84022	68	OT7
chr17	43289841	43289948	27	45	+	6	AGGAGAGAGAGAGAGAGAGACA	ACA	35	3.95184	8.37525	3.54389	54	OT6
chr17	43289841	43289948	45	63	+	6	GACAGAGAGAGAGACAGAGAGA	AGA	35	3.95184	8.37525	3.54389	54	OT5
chr17	42276251	42276353	50	68	-	6	GAGCGAGCGGGCGGGCGGGCAA	CAA	79	2.35367	13.1864	7.97859	61	OT4
chr17	42276251	42276353	54	72	-	5	GAGGGAGCGAGCGGGCGGGCGG	CGG	79	2.35367	13.1864	7.97859	61	OT3
chr17	42276251	42276353	58	76	-	3	GAGGGAGGGAGCGAGCGGGCGG	CGG	79	2.35367	13.1864	7.97859	61	OT2
chr17	42276251	42276353	62	80	-	3	GGCCGAGGGAGGGAGCGAGCGG	CGG	79	2.35367	13.1864	7.97859	61	OT1

## Sheet: dFn_myc_peaks_unique_NGG
chromosome	start	end	start_crRNA	end_crRNA	strand	Mismatch	crRNA sequence	PAM	score	fold_enrichment	f-log10(pvalue)	-log10(qvalue)	pileup	status
chr8	127736074	127736455	183	201	+	0	GGCAGAGGGAGCGAGCGGGCGG	CGG	900	8.76234	97.347	90.0035	188	ON Target
chr16	77551743	77551894	53	71	+	3	CTGAGAGGGAGCGAGCGGGAGG	AGG	76	7.55978	12.8345	7.64797	64	OT17
chr17	42276251	42276353	62	80	-	3	GGCCGAGGGAGGGAGCGAGCGG	CGG	79	2.35367	13.1864	7.97859	61	OT1

## Sheet: dSp_myc_peaks_redundant
chromosome	start	end	start_crRNA	end_crRNA	strand	Mismatch	crRNA sequence	PAM	score	fold_enrichment	f-log10(pvalue)	-log10(qvalue)	pileup	status
chr8	127736172	127736377	85	103	+	0	GGCAGAGGGAGCGAGCGGGCGG	CGG	110	2.95772	15.809	11.0613	97	ON
chr8	127736172	127736377	6	24	+	6	AACGGAGGGAGGGATCGCGCTG	CTG	110	2.95772	15.809	11.0613	97	OT41
chr8	127736172	127736377	89	107	+	6	GAGGGAGCGAGCGGGCGGCCGG	CGG	110	2.95772	15.809	11.0613	97	OT40
chr13	61898610	61899004	224	242	-	6	GGAGGAGGGAGGAAGGGAGGGA	GGA	95	5.91277	14.2136	9.53292	187	OT39
chr13	61898610	61899004	238	256	-	6	GAGGGAGGGAGGGAGGAGGAGG	AGG	95	5.91277	14.2136	9.53292	187	OT38
chr13	61898610	61899004	242	260	-	6	GAGGGAGGGAGGGAGGGAGGAG	GAG	95	5.91277	14.2136	9.53292	187	OT37
chr13	66368657	66368892	174	192	+	5	GGCAAAGAGAGAGAGCTTGTGC	TGC	88	6.84268	13.5009	8.84936	137	OT36
chr18	30446666	30446867	153	171	-	6	GGCAGGGGGGACTATAGGGCCT	CCT	78	6.50055	12.4816	7.88223	118	OT35
chr18	30446666	30446867	163	181	-	6	GGTAGGGGGCGGCAGGGGGGAC	GAC	78	6.50055	12.4816	7.88223	118	OT34
chr9	79694116	79694426	46	64	+	6	AGGAGAAAGAGGGAGAGGGAAA	AAA	78	6.50055	12.4816	7.88223	169	OT33
chr7	71680414	71680601	10	28	-	6	GAGAGAGGGAGGGAGGAAGGGA	GGA	78	5.63622	12.4521	7.86821	46	OT32
chr7	71680414	71680601	16	34	-	6	GGAAGGGAGAGAGGGAGGGAGG	AGG	78	5.63622	12.4521	7.86821	46	OT31
chr7	71680414	71680601	36	54	-	5	GGAAGAGAGAGAGGGAGGGAGG	AGG	78	5.63622	12.4521	7.86821	46	OT30
chr7	71680414	71680601	40	58	-	6	GGGAGGAAGAGAGAGAGGGAGG	AGG	78	5.63622	12.4521	7.86821	46	OT29
chr7	71680414	71680601	50	68	-	6	GAGAGAGGGAGGGAGGAAGAGA	AGA	78	5.63622	12.4521	7.86821	46	OT28
chr13	61820073	61820280	45	63	+	6	GGTGGAGGGAGGTAGGAGGGTA	GTA	57	5.61854	10.1676	5.73944	75	OT27
chr22	15706690	15706959	197	215	-	6	GGTAGAGGGCAGGAAAGGGTGA	TGA	51	5.47414	9.56089	5.16518	132	OT26
chr13	61829537	61829722	87	105	-	6	GGCAAAGGGGGTGTGAGGTGTC	GTC	50	4.98654	9.37742	5.02544	53	OT25
chr9	79584209	79584421	122	140	-	4	GGCAGAGGCAATGAGAGGGTAG	TAG	50	4.98654	9.37742	5.02544	95	OT24
chr13	65385672	65385901	46	64	+	6	GGAAGAGAGAGAGAGAGACAGA	AGA	46	4.96116	8.99756	4.66709	87	OT23
chr13	61753507	61753663	10	28	-	5	GGCAGCAGGAGAGAGAGAGAAG	AAG	44	5.0419	8.81136	4.49376	61	OT22
chr10	18810775	18810958	55	73	-	6	GGGGGAGGGAGGAGGAGGGGAG	GAG	43	5.13201	8.63731	4.33389	114	OT21
chr10	18810775	18810958	59	77	-	6	GAGAGGGGGAGGGAGGAGGAGG	AGG	43	5.13201	8.63731	4.33389	114	OT20
chr10	18810775	18810958	61	79	-	6	GGGAGAGGGGGAGGGAGGAGGA	GGA	43	5.13201	8.63731	4.33389	114	OT19
chr13	75702192	75702442	54	72	-	5	GCCAGAAGGAAGGAGCAGGGAA	GAA	43	5.13201	8.63731	4.33389	42	OT18
chr18	36859423	36859554	51	69	-	6	GGCAGGGAGTGAGGGAGGGAAC	AAC	43	5.13201	8.63731	4.33389	69	OT17
chr18	36859423	36859554	102	120	-	6	GAAAAAGGGAGGGAGGGAGGGA	GGA	43	5.13201	8.63731	4.33389	69	OT16
chr13	66813419	66813593	22	40	+	6	GGAAGAGAGAAAGGGTGGGAGG	AGG	40	4.95754	8.33936	4.09705	93	OT15
chr13	62897861	62898044	33	51	+	6	GGTAGAGGGATGCAGTGGCAGG	AGG	35	4.78988	7.74129	3.53972	157	OT14
chr13	62957100	62957257	7	25	+	6	GGCAGAGATAGCAACCCCGCAC	CAC	35	4.78988	7.74129	3.53972	59	OT13
chr13	64262691	64262896	10	28	-	6	GGCAGCAGGAGAGAGAAGAAAG	AAG	35	4.78988	7.74129	3.53972	179	OT12
chr13	65891423	65891541	99	117	-	5	GGCAGAGGGAGAGAAAAGTAGC	AGC	35	4.78988	7.74129	3.53972	57	OT11
chr18	38337827	38337949	49	67	-	6	TGCAGAGGGTGAGGGGTGGGCA	GCA	35	4.78988	7.74129	3.53972	94	OT10
chr4	26209635	26209789	14	32	-	6	GGAAGGGAGGGAGAGAGGGAAG	AAG	35	4.78988	7.74129	3.53972	51	OT9
chr4	26209635	26209789	44	62	-	6	GAAGGAGGAAGGGAGGGGGAGA	AGA	35	4.78988	7.74129	3.53972	51	OT8
chr4	26209635	26209789	124	142	-	6	GGGAGAGGGAAGGAGGAAGGGA	GGA	35	4.78988	7.74129	3.53972	51	OT7
chr1	242233535	242233642	35	53	+	6	GGCAGGGAGGGAGGGAGGGCTG	CTG	28	4.44774	6.87466	2.80402	15	OT6
chr13	65272302	65272432	26	44	+	5	GCCAGCAGGAGAGAGTGGGAGG	AGG	28	4.44774	6.87466	2.80402	85	OT5
chrX	102483975	102484092	57	75	+	6	GGAAGAGAGAGAGGGAAGGGGG	GGG	28	4.44774	6.87466	2.80402	98	OT4
chr7	47956209	47956342	60	78	+	6	GGAAAAGAGAGCGGGAGGTGGG	GGG	27	4.35731	6.7235	2.74751	16	OT3
chrX	108792735	108792850	95	113	-	6	GGCAGGGGGTGGGAGAGCCTCA	TCA	21	4.10561	6.03949	2.12772	56	OT2
chrY	11240822	11240950	7	25	+	5	AGCAGGTGGAGCCAACGGGCTA	CTA	21	4.10561	6.03949	2.12772	64	OT1

## Sheet: dSp_myc_peaks_uniq_NGG
chromosome	start	end	start_crRNA	end_crRNA	strand	Mismatch	crRNA sequence	PAM	score	fold_enrichment	f-log10(pvalue)	-log10(qvalue)	pileup	status
chr8	127736172	127736377	85	103	+	0	GGCAGAGGGAGCGAGCGGGCGG	CGG	110	2.95772	15.809	11.0613	97	ON
chr13	61898610	61899004	238	256	-	6	GAGGGAGGGAGGGAGGAGGAGG	AGG	95	5.91277	14.2136	9.53292	187	OT38
chr7	71680414	71680601	36	54	-	5	GGAAGAGAGAGAGGGAGGGAGG	AGG	78	5.63622	12.4521	7.86821	46	OT30
chr10	18810775	18810958	59	77	-	6	GAGAGGGGGAGGGAGGAGGAGG	AGG	43	5.13201	8.63731	4.33389	114	OT20
chr13	66813419	66813593	22	40	+	6	GGAAGAGAGAAAGGGTGGGAGG	AGG	40	4.95754	8.33936	4.09705	93	OT15
chr13	62897861	62898044	33	51	+	6	GGTAGAGGGATGCAGTGGCAGG	AGG	35	4.78988	7.74129	3.53972	157	OT14
chr13	65272302	65272432	26	44	+	5	GCCAGCAGGAGAGAGTGGGAGG	AGG	28	4.44774	6.87466	2.80402	85	OT5
chrX	102483975	102484092	57	75	+	6	GGAAGAGAGAGAGGGAAGGGGG	GGG	28	4.44774	6.87466	2.80402	98	OT4
chr7	47956209	47956342	60	78	+	6	GGAAAAGAGAGCGGGAGGTGGG	GGG	27	4.35731	6.7235	2.74751	16	OT3
